# Supplementary material for: Investigating the Dynamic Aspects of Drug-Protein Recognition through a Combination of MD and NMR Analyses: Implications for the Development of Protein-Protein Interaction Inhibitors
Source: PubMed Central journal article supplement (PMC4035249; doi:10.1371/journal.pone.0097153), 2014-05-27
Supplement: pone.0097153.s001.pdf [file pone.0097153.s001.pdf]

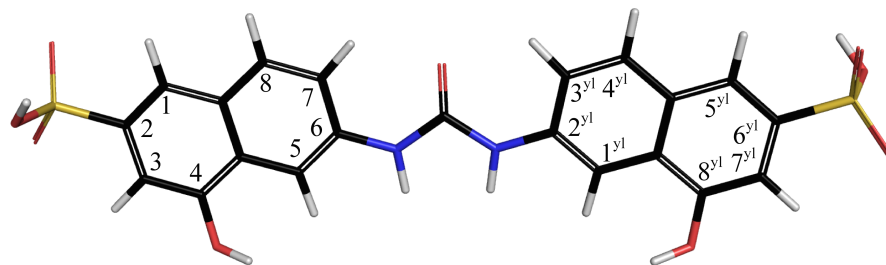

**Figure S1.** Chemical structure of **sm27**.

## Supplementary Materials

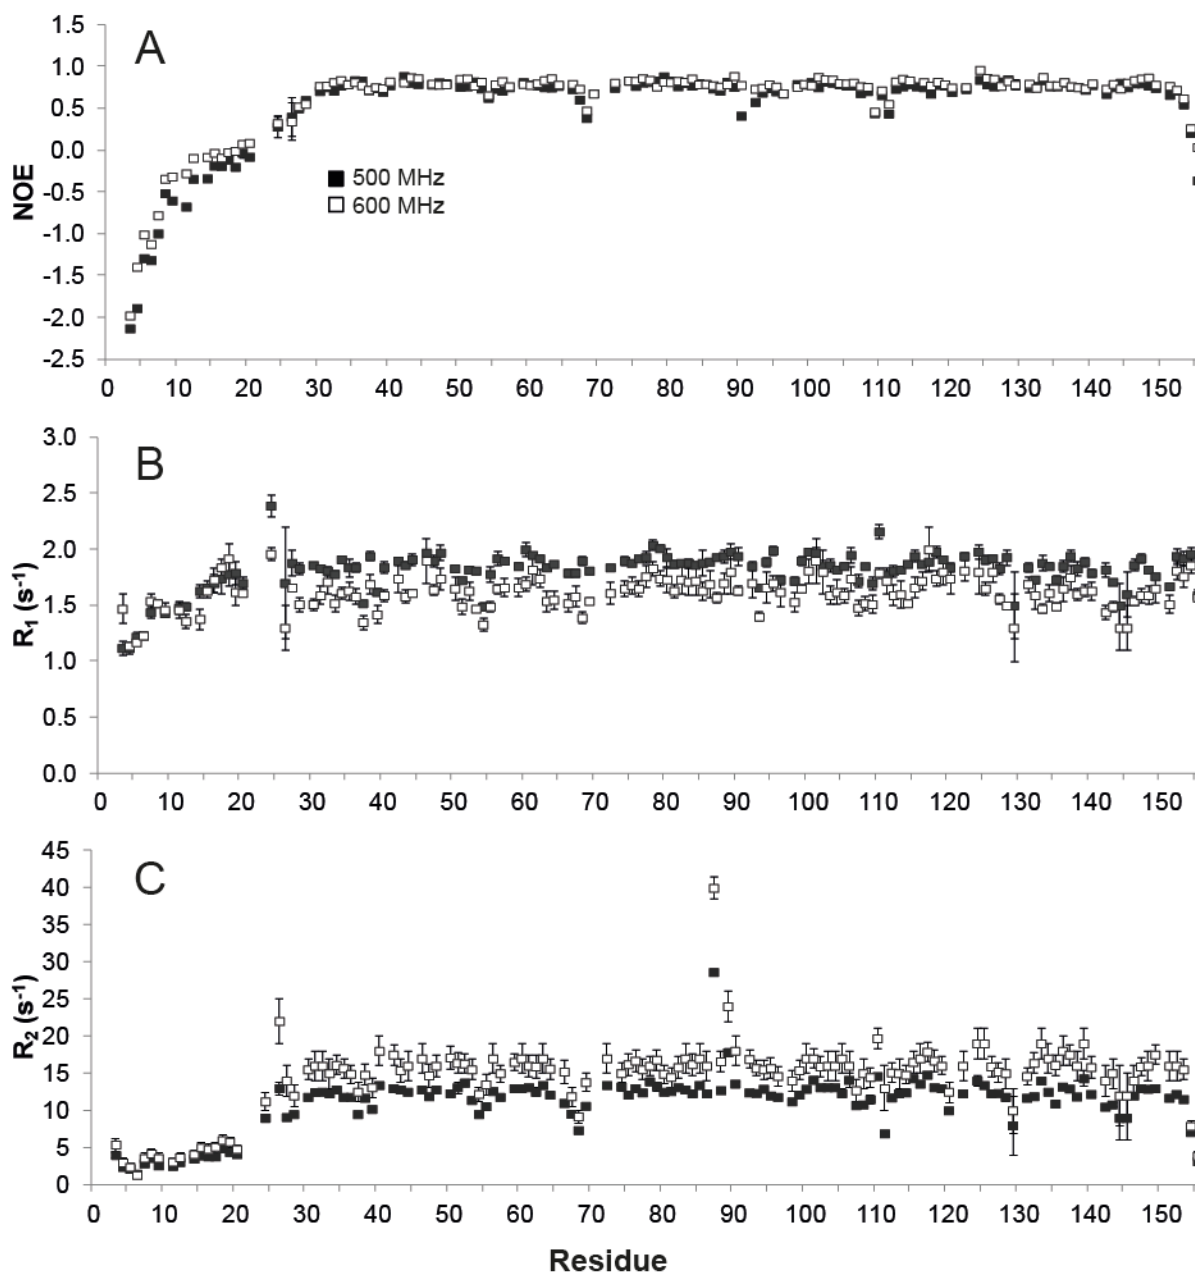

**Figure S2**  $^{15}\text{N}$ -spin relaxation parameters of FGF2 measured at 500 MHz and 600 MHz: (A) Steady-state heteronuclear NOE, (B)  $R_2$ , (C)  $R_1$ , and (D)  $R_2/R_1$  values.

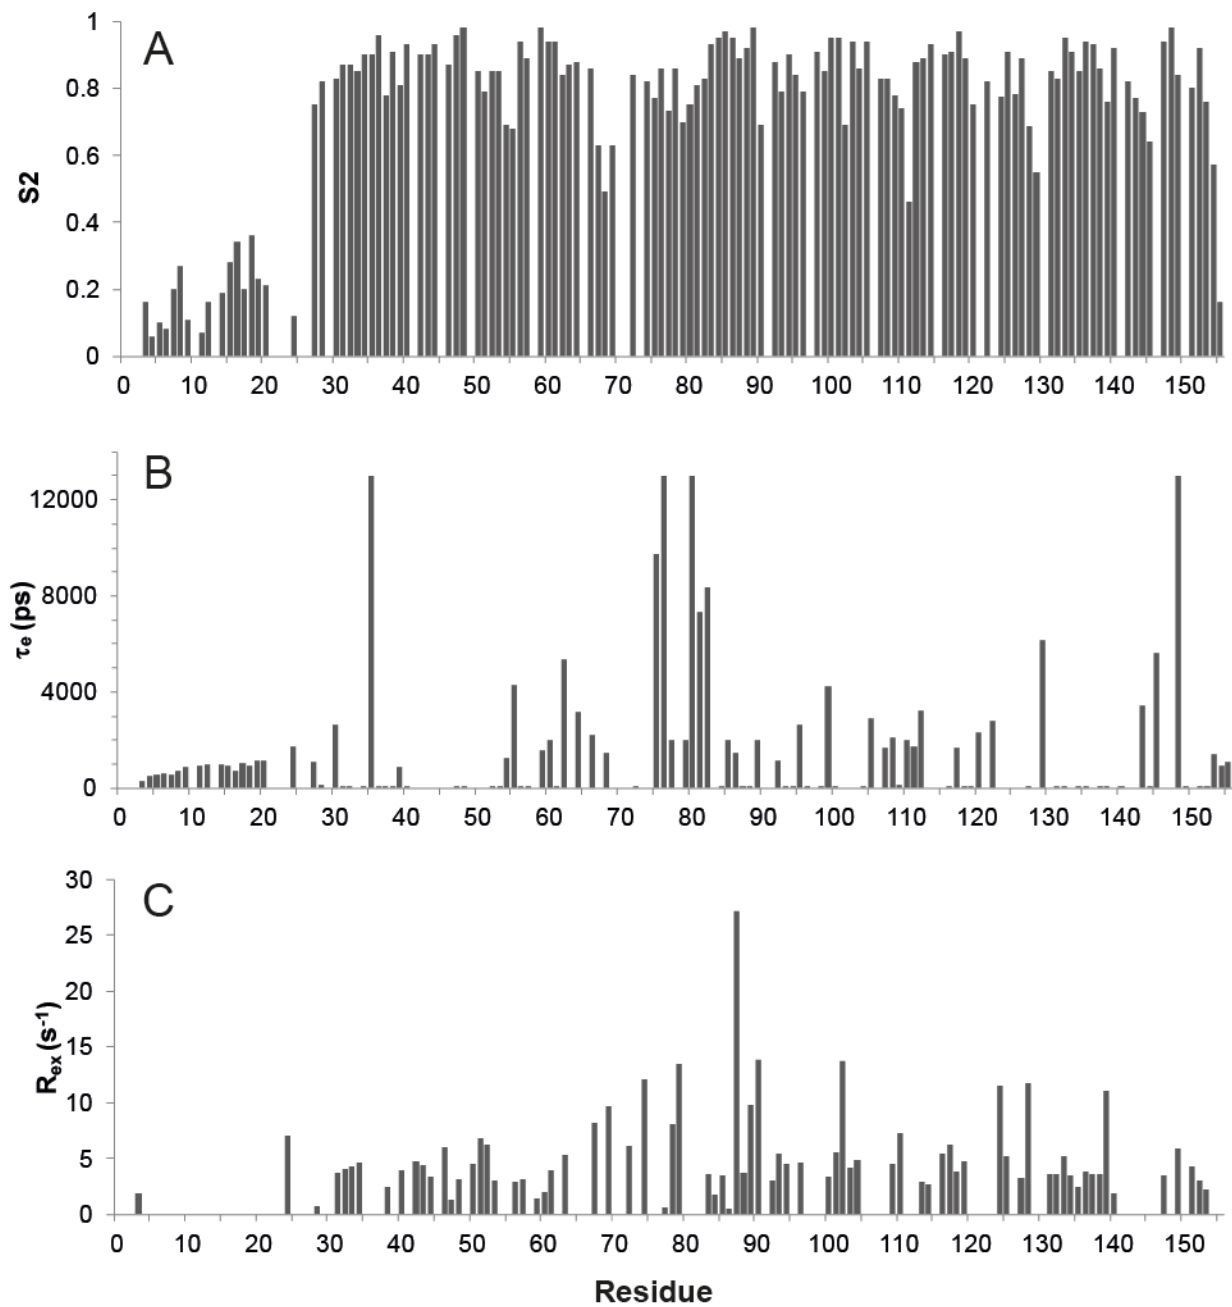

**Figure S3** Model-free parameters. (A) S2, (B)  $\tau_e$ , and (C)  $R_{ex}$  of FGF2 backbone amides, derived from a model-free analysis of the relaxation data at 500 and 600 MHz.
